# Supplementary material for: Association of Polygenic Risk for Attention-Deficit/Hyperactivity Disorder With Co-occurring Traits and Disorders
Source: PubMed Central journal article supplement (PMC6278881; doi:10.1016/j.bpsc.2017.11.013), 2018-07
Supplement: mmc1.pdf [file mmc1.pdf]

# Association of Polygenic Risk for Attention-Deficit/Hyperactivity Disorder With Co-Occurring Traits and Disorders

## *Supplementary Information*

**Supplemental Methods.** Significance thresholds

**Table S1.** List of items in the Verbal-Numerical Reasoning test

**Table S2.** List of items in the Eysenck Personality Inventory Neuroticism scale – Revised (EPIN-R)

**Table S3.** List of ICD-10 codes for psychiatric diagnoses used as target phenotypes

**Table S4.** List of responses for alcohol intake frequency measure

**Table S5.** Detailed summary of control phenotypes

**Table S6.** Detailed summary of educational achievement

**Table S7.** Predictive accuracy of PRS on the target phenotypes after controlling for BMI and educational achievement

**Figure S1.** Plot for alcohol dependency

**Figure S2.** Plot for alcohol intake frequency

**Figure S3.** Plot for anxiety

**Figure S4.** Plot for bipolar disorder

**Figure S5.** Plot for BMI

**Figure S6.** Plot for depressive disorder

**Figure S7.** Plot for verbal-numerical reasoning

**Figure S8.** Plot for neuroticism

**Figure S9.** Plot for risk-taking

**Figure S10.** Plot for schizophrenia

**Figure S11.** Plot for tobacco use

## Supplemental Methods

### Significance thresholds

For our primary PRS analyses, we selected a conservative significance threshold to control for multiple testing by applying a Bonferroni correction. Euesden et al.(1) recommend using a significance threshold of at least  $P=0.004$  in order to control for the high-resolution scoring approach of selecting the most predictive PRS. As we tested the most predictive PRS across each of the 11 target phenotypes, we divided the P-value by the number of tests performed ( $P=0.004/19$ ), which resulted in a significance threshold of  $P=2.1 \times 10^{-4}$ .

For our secondary analyses, where we tested the main effects of sex and PRS\*sex interaction effects, we selected a conservative significance threshold of  $P=0.01$  as we did not have strong a priori hypotheses of the effects. We applied Bonferroni correction in order to control for the 22 secondary analyses we ran ( $P=0.01/22$ ), which resulted in a significance threshold of  $P=4.5 \times 10^{-4}$ .

1. Euesden J, Lewis CM, O'Reilly PF. PRSice: Polygenic Risk Score software. *Bioinformatics*. 2015;31(9): 1466-1468.

**Table S1: List of items in the Verbal-Numerical Reasoning test**

| <b>Question</b>                                                                                                                 | <b>Possible answers</b>                                                     |
|---------------------------------------------------------------------------------------------------------------------------------|-----------------------------------------------------------------------------|
| Add the following numbers together: 1 2 3 4 5 – is the answer?                                                                  | 13/14/15/16/17/Do not know/Prefer not to answer                             |
| Which number is the largest?                                                                                                    | 642/308/987/714/253/Do not know/Prefer not to answer                        |
| Bud is to flower as child is to?                                                                                                | Grow/Develop/Improve/Adult/Old/Do not know/Prefer not to answer             |
| 11 12 13 14 15 16 17 18 Divide the sixth number to the right of twelve by three. Is the answer?                                 | 5/6/7/8/Do not know/Prefer not to answer                                    |
| If Truda's mother's brother is Tim's sister's father, what relation is Truda to Tim?                                            | Aunt/Sister/Niece/Cousin/No relation/Do not know/Prefer not to answer       |
| If sixty is more than half of seventy-five, multiply twenty-three by three. If not subtract 15 from eighty-five. Is the answer? | 68/69/70/71/72/Do not know/Prefer not to answer                             |
| Stop means the same as?                                                                                                         | Pause/Close/Cease/Break/Rest/Do not know/Prefer not to answer               |
| If David is twenty-one and Owen is nineteen and Daniel is nine years younger than David, what is half their combined age?       | 25/26/27/28/29/Do not know/Prefer not to answer                             |
| Age is to years as height is to?                                                                                                | Long/Deep/Top/Metres/Tall/Do not know/Prefer not to answer                  |
| 150...137...125...114...104... What comes next?                                                                                 | 96/95/94/93/92/Do not know/Prefer not to answer                             |
| Relaxed means the opposite of?                                                                                                  | Calm/Anxious/Cool/Worried/Tense/Do not know/Prefer not to answer            |
| 100...99...95...86...70...What comes next?                                                                                      | 50/49/48/47/46/45/Do not know/Prefer not to answer                          |
| If some flinks are plinks and some plinks are stinks then some flinks are definitely stinks?                                    | False/True/Neither true nor false/Not sure/Do not know/Prefer not to answer |

**Table S2: List of items in the Eysenck Personality Inventory Neuroticism scale – Revised (EPIN-R)**

| Question                                                | Possible answers                        |
|---------------------------------------------------------|-----------------------------------------|
| Does your mood often go up and down?                    | Yes/No/Do not know/Prefer not to answer |
| Do you ever feel 'just miserable' for no reason?        |                                         |
| Are you an irritable person?                            |                                         |
| Are your feelings easily hurt?                          |                                         |
| Do you often feel 'fed-up'?                             |                                         |
| Would you call yourself a nervous person?               |                                         |
| Are you a worrier?                                      |                                         |
| Would you call yourself tense or 'highly strung'?       |                                         |
| Do you worry too long after an embarrassing experience? |                                         |
| Do you suffer from 'nerves'?                            |                                         |
| Do you often feel lonely?                               |                                         |
| Are you often troubled by feelings of guilt?            |                                         |

*Note: If individuals responded 'Do not know' or 'Prefer not to answer', they were excluded from analyses.*

**Table S3: List of ICD-10 codes for psychiatric diagnoses used as target phenotypes**

| <b>Psychiatric diagnoses</b>                                                                     | <b>ICD-10 codes</b> |
|--------------------------------------------------------------------------------------------------|---------------------|
| <b><i>Anxiety and stress-related disorders</i></b>                                               |                     |
| Phobic anxiety disorders                                                                         | F40                 |
| Other anxiety disorders                                                                          | F41                 |
| Obsessive-compulsive disorder                                                                    | F42                 |
| Reaction to severe stress, and adjustment disorders<br>(includes post-traumatic stress disorder) | F43                 |
| <b><i>Depressive disorders</i></b>                                                               |                     |
| Depressive episode                                                                               | F32                 |
| Recurrent depressive disorder                                                                    | F33                 |
| <b><i>Bipolar affective disorder</i></b>                                                         | F31                 |
| <b><i>Schizophrenia, schizotypal and delusional disorders</i></b>                                |                     |
| Schizophrenia                                                                                    | F20                 |
| Schizotypal disorder                                                                             | F21                 |
| Persistent delusional disorders                                                                  | F22                 |
| Acute and transient psychotic disorders                                                          | F23                 |
| Induced delusional disorder                                                                      | F24                 |
| Schizoaffective disorders                                                                        | F25                 |
| Other nonorganic psychotic disorders                                                             | F28                 |
| Unspecified nonorganic psychosis                                                                 | F29                 |
| <b><i>Mental and behavioural disorders due to use of alcohol</i></b>                             |                     |
| Acute intoxication                                                                               | F10.0               |
| Harmful use                                                                                      | F10.1               |
| Dependence syndrome                                                                              | F10.2               |
| Withdrawal state                                                                                 | F10.3               |
| Withdrawal state with delirium                                                                   | F10.4               |
| Psychotic disorder                                                                               | F10.5               |
| Amnesic syndrome                                                                                 | F10.6               |
| Residual and late-onset psychotic disorder                                                       | F10.7               |
| Other mental and behavioural disorders                                                           | F10.8               |
| Unspecified mental and behavioural disorder                                                      | F10.9               |

**Table S4: List of responses for alcohol intake frequency measure**

| <b>Question</b>                       | <b>Possible answers</b>                                                                                                                       |
|---------------------------------------|-----------------------------------------------------------------------------------------------------------------------------------------------|
| About how often do you drink alcohol? | 1=Daily or almost daily<br>2=Three or four times a week<br>3=Once or twice a week<br>4=One to three times a month<br>5=Special occasions only |

*Note: Answers were reverse-coded and individuals who responded 'Do not know' or 'Prefer not to answer', were excluded from analyses.*

**Table S5: Detailed summary of control phenotypes**

| Phenotype                              | Description                                                                                                                                                                                                                      | Covering N genotyped participants | Mean (SD)/ N Cases (%) |
|----------------------------------------|----------------------------------------------------------------------------------------------------------------------------------------------------------------------------------------------------------------------------------|-----------------------------------|------------------------|
| Height (cm)                            | Standing height measured in centimeters during initial assessment                                                                                                                                                                | 135,495                           | 168.70 (9.21)          |
| Age (years)                            | Age when attended initial assessment, derived from date of birth and date of attending assessment centre and truncated to whole year                                                                                             | 135,726                           | 56.79 (7.96)           |
| Year of initial assessment             | Year when participants came in for initial assessment                                                                                                                                                                            | 135,726                           | 2008.57 (0.88)         |
| Number of self-reported cancers        | Number of self-reported cancers recorded using a touch-screen self-completed questionnaire followed by an interview at initial assessment                                                                                        | 135,146                           | 0.09 (0.31)            |
| Hand grip strength                     | Hand grip strength of left hand measured using a Jamar J00105 hydraulic hand dynamometer. This measures grip force isometrically in kilograms.                                                                                   | 135,163                           | 29.89 (11.35)          |
| Visual acuity                          | Visual acuity of left eye measured as the smallest size letters that can be reliably identified at a specified distance. The UK Biobank system is based on a traditional LogMar chart with data captured by Direct Entry to Vox. | 29,326                            | 0.02 (0.21)            |
| Menstruating during initial assessment | Question: "Are you menstruating today? (We are asking this as it may affect the urine sample that you have been asked to provide)". Possible answers: Yes, No, Do not know, Prefer not to answer.                                | 18,829                            | 2,781 (15%)            |
| Sex of baby                            | Sex of baby refers to the sex of the participants' child as recorded across all episodes in hospitals. Possible codes: 0=Not known, 1=Male, 2=Female, 3= Indeterminate, 9= Not specified.                                        | 3,645                             | 2,818 female (77%)     |

**Table S6: Detailed summary of educational achievement**

| Description of education variable                                     | Items                                                                                                                                                                                                                                                                                 |
|-----------------------------------------------------------------------|---------------------------------------------------------------------------------------------------------------------------------------------------------------------------------------------------------------------------------------------------------------------------------------|
| Education was based on self-report of highest qualification achieved. | 1=College or University degree<br>2=A levels/AS levels or equivalent<br>3=O levels/GCSEs or equivalent<br>4=CSEs or equivalent<br>5=NVQ or HND or HNC or equivalent<br>6=Other professional qualifications e.g.: nursing, teaching<br>-7=None of the above<br>-3=Prefer not to answer |

*Note: Participants that replied 'None of the above' or 'Prefer not to answer' were excluded from analyses.*



**Table S7: Predictive accuracy of PRS on the target phenotypes after controlling for BMI and educational achievement**

|                            | <b>P</b>  | <b>P<sub>T</sub></b> | <b>R<sup>2</sup> (%)</b> |
|----------------------------|-----------|----------------------|--------------------------|
| BMI                        | 2.7*10-99 | 0.121                | 0.342                    |
| Verbal-numerical reasoning | 2.9*10-9  | 0.418                | 0.070                    |
| Alcohol intake frequency   | 2.7*10-5  | 0.231                | 0.013                    |
| Risk taking                | 1.2*10-25 | 0.291                | 0.120                    |
| Neuroticism                | 3.5*10-12 | 0.139                | 0.045                    |
| Tobacco use                | 1.6*10-13 | 0.488                | 0.230                    |
| Depressive disorder        | 1.7*10-8  | 0.033                | 0.067                    |
| Alcohol dependency         | 2.6*10-5  | 0.175                | 0.177                    |
| Anxiety disorder           | 0.005     | 0.116                | 0.037                    |
| Bipolar disorder           | 0.041     | 0.117                | 0.022                    |
| Schizophrenia              | 0.280     | 0.263                | 0.032                    |

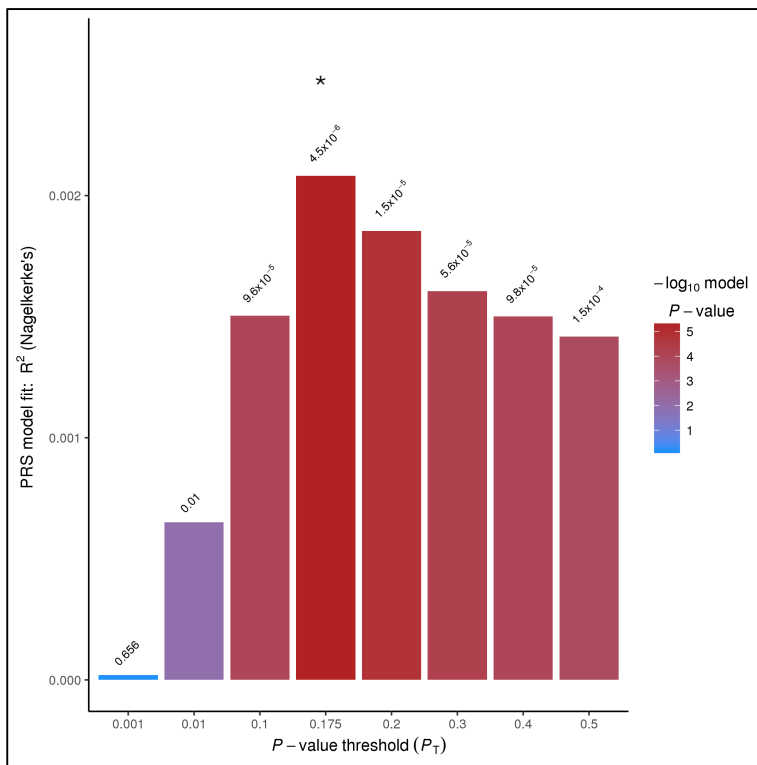

**Figure S1: Plot for alcohol dependency**

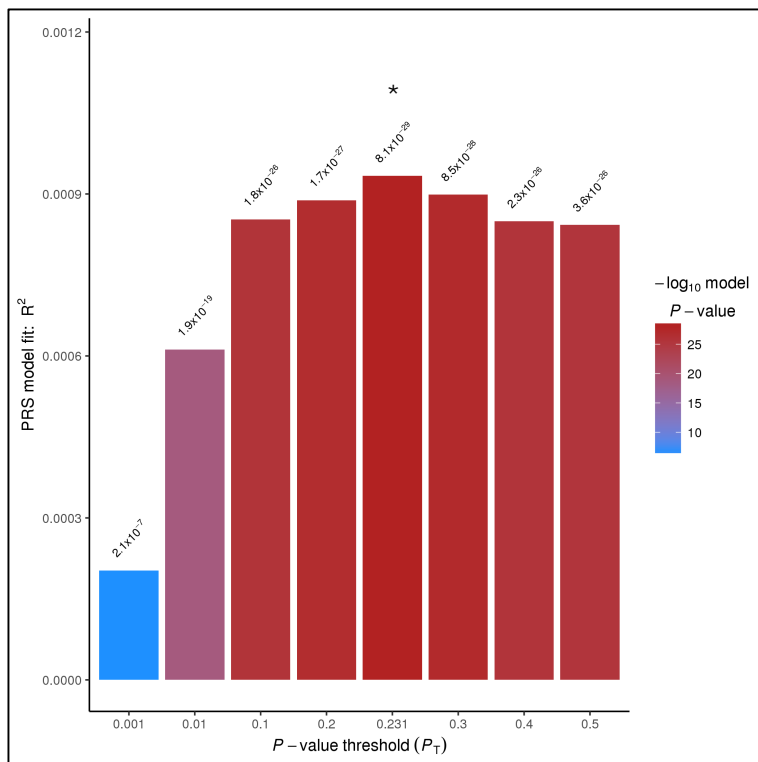

**Figure S2: Plot for alcohol intake frequency**

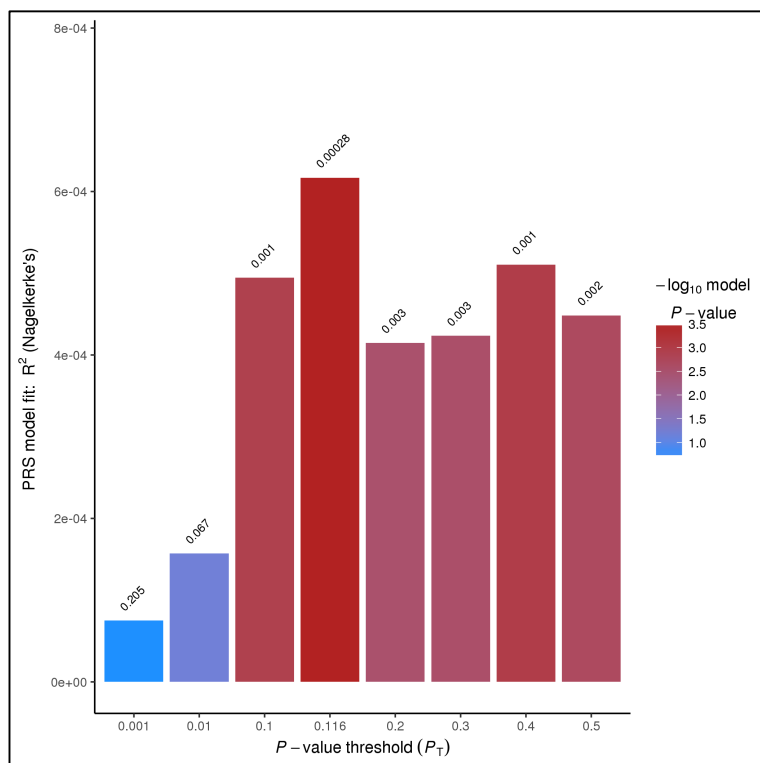

**Figure S3: Plot for anxiety**

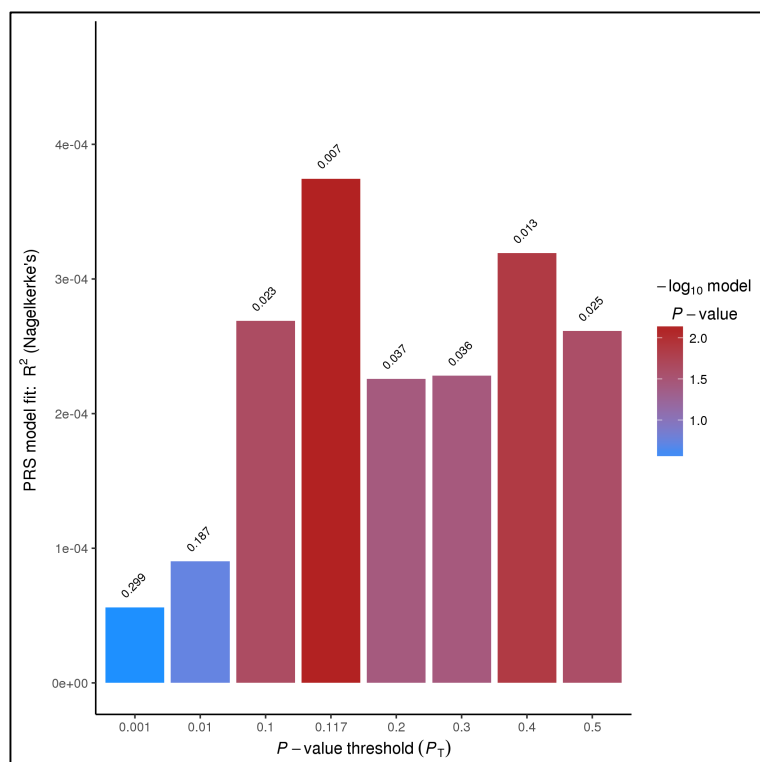

**Figure S4: Plot for bipolar disorder**

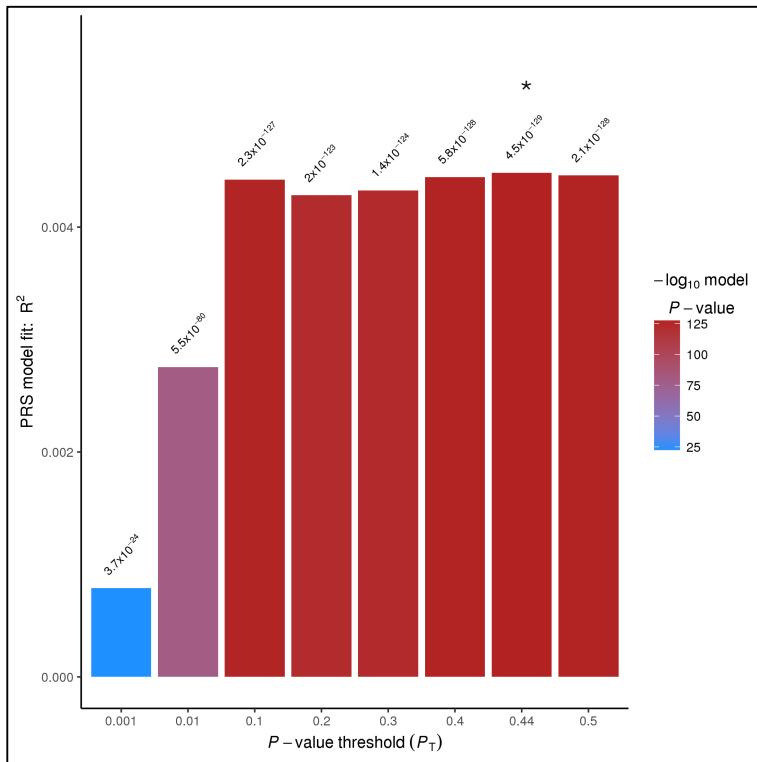

Figure S5: Plot for BMI

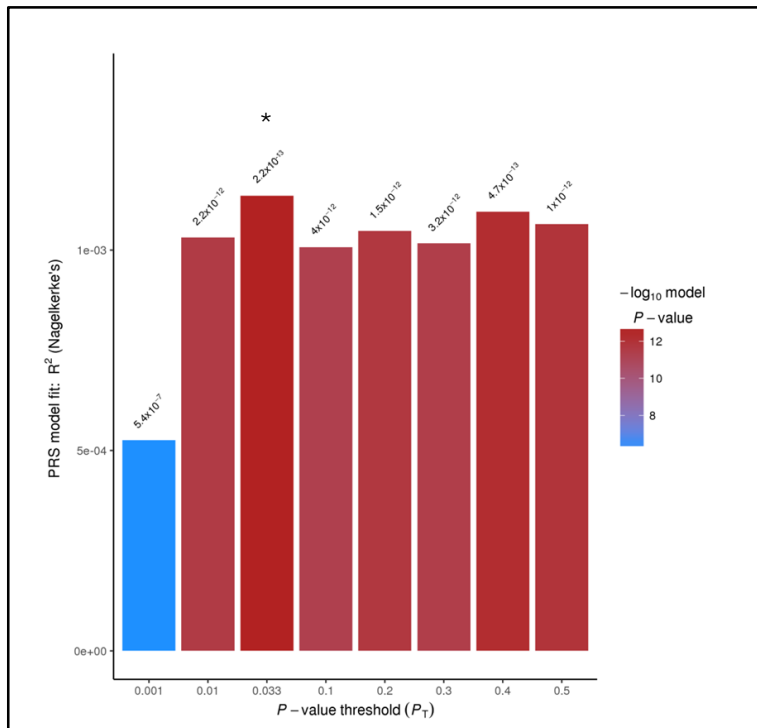

Figure S6: Plot for depressive disorder

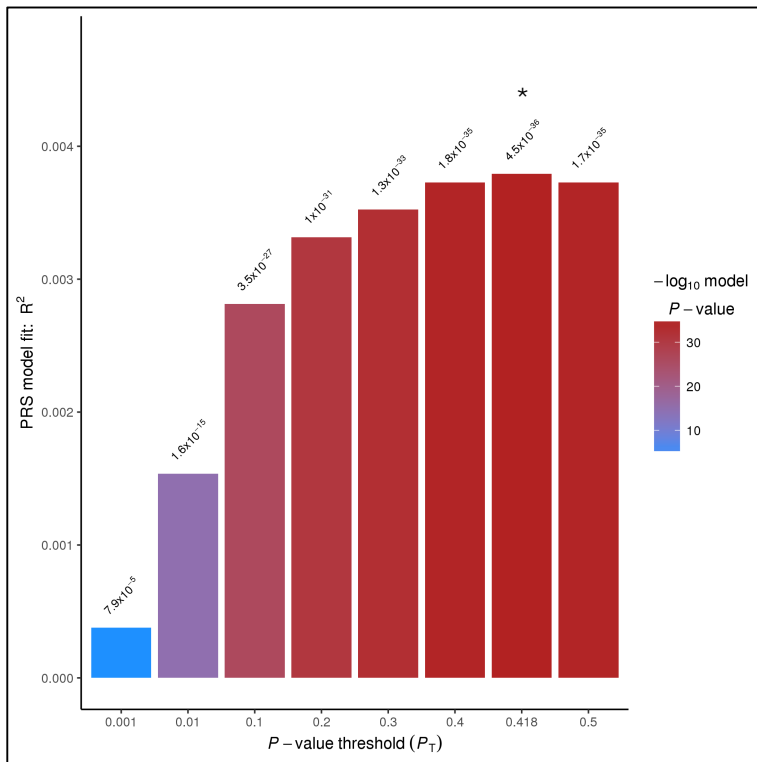

**Figure S7: Plot for verbal-numerical reasoning**

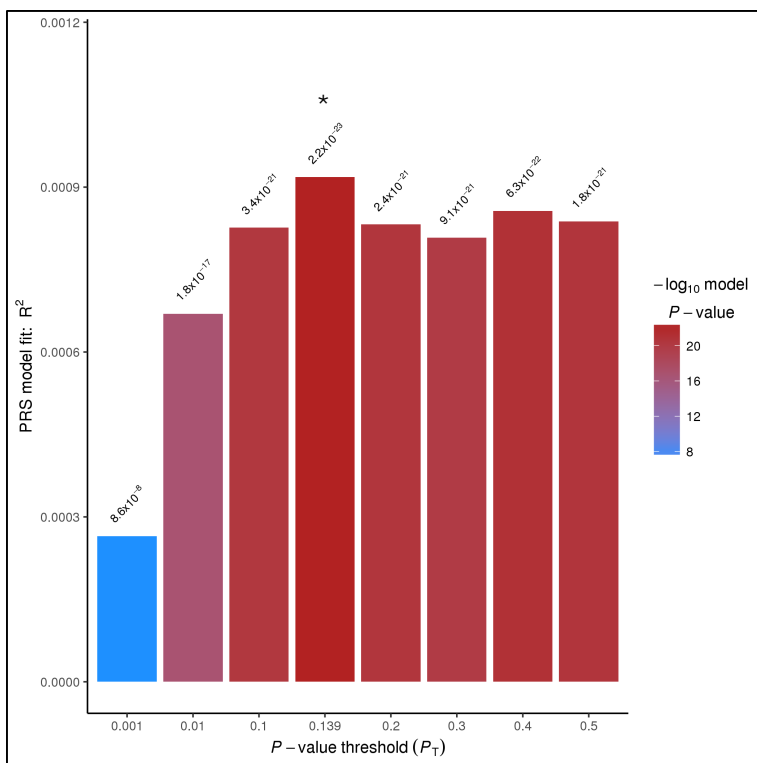

**Figure S8: Plot for neuroticism**

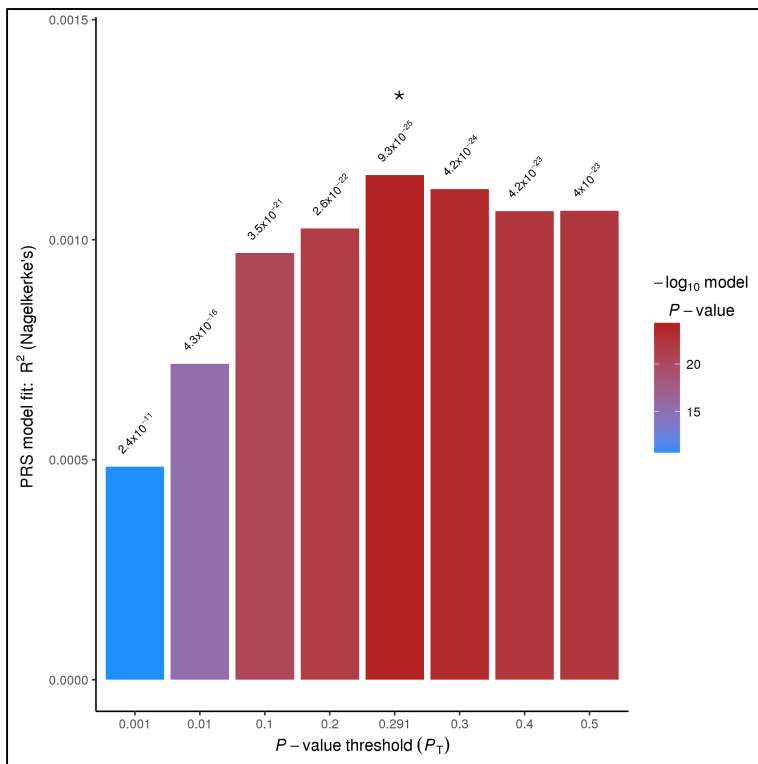

**Figure S9: Plot for risk taking**

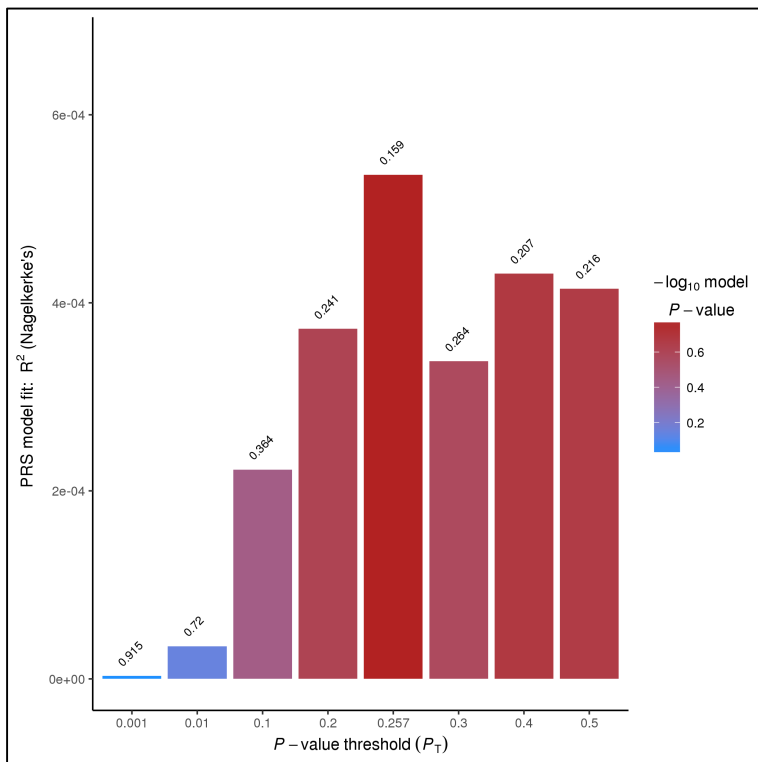

**Figure S10: Plot for schizophrenia**

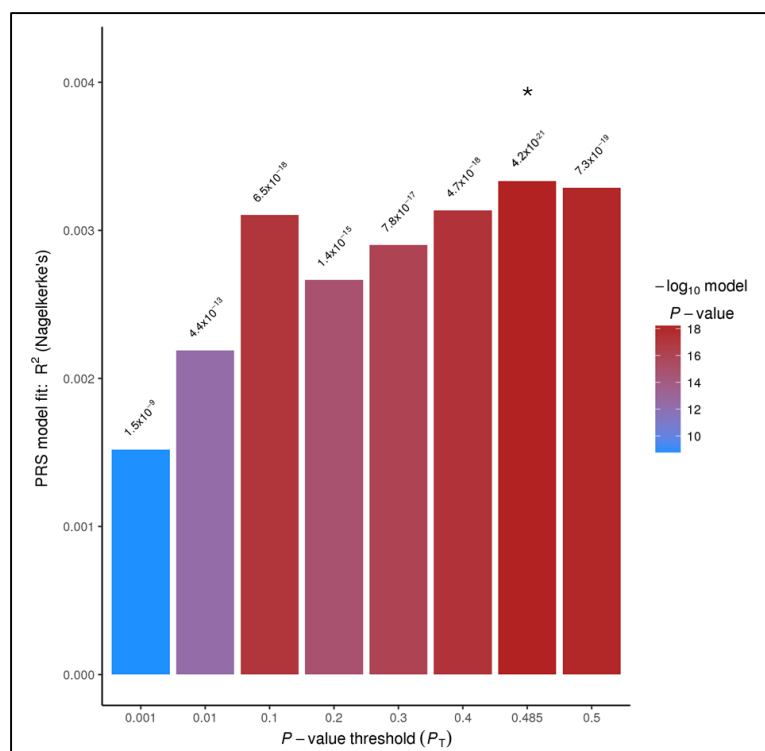

**Figure S11: Plot for tobacco use**

Note: P-value threshold represents the P-value at the cut-off for inclusion of single-nucleotide polymorphisms in the polygenic risk score. Values on top of the bars represent P-values for the regression models.

\* p-value below significance threshold.
